# Supplementary material for: Pallidal beta power is associated with depression in Parkinson’s disease
Source: Research Square preprint supplement (doi:10.21203/rs.3.rs-5952073/v1), 2025-03-24
Supplement: Supplementary file 1 [file 959486f6093d88e15718afce.xlsx]

## Sheet: ClinicalVar+BandPower
PtNum	Hemi	Sex	Age	EvalTimePoint	BDI	STAITrait	AS	UPDRS_OFF	UPDRS_ON	DiseaseDuration	LEDD	Antidepressant	Benzodiazepine	NonBenzo	DeltaNormRingMean	ThetaNormRingMean	AlphaNormRingMean	BetaNormRingMean	LowBetaNormRingMean	HighBetaNormRingMean	GammaNormRingMean	LowGammaNormRingMean	HighGammaNormRingMean	HFONormRingMean	FOOOFExpMean	FOOOFOffsetMean
1	Left	F	55	3	10	30	2	25	32	3	75	NO	NO	NO	0.676423	0.489509	0.530764	0.360439	0.452867	0.29574	0.0458135	-0.0743147	0.101045	-0.0507685	0.963441	1.34826
2	Left	F	52	5	3	37	8	36	25	2	700	YES	YES	YES	0.00689808	-0.0881492	0.146382	0.743158	0.470387	0.934098	0.0961682	0.396171	-0.0417643	-0.0796661	1.90339	2.91642
3	Right	F	64	3	6	28	17	41	27	18	1830	NO	YES	YES	-0.0179824	0.370861	1.08655	1.10348	1.20741	1.03074	0.0595534	0.332469	-0.0659253	-0.0459719	1.89527	2.34086
4	Right	F	69	4	16	37	13	38	24	17	1008	YES	YES	NO	0.0299173	0.0140015	0.425464	0.877058	0.893812	0.86533	0.0856555	0.409133	-0.0630698	0.0395525	1.73504	2.6491
5	Left	M	75	3	3	27	4	NaN	21	19	2000	YES	YES	NO	0.386942	0.164637	0.391503	0.539483	0.637635	0.470777	0.0187214	-0.0923498	0.0697886	-0.0781646	1.20343	2.11967
6	Left	M	64	6	9	41	18	46	26	13	1000	YES	NO	NO	0.0494721	0.496204	0.967984	0.822691	0.78234	0.850938	0.0802871	0.336822	-0.043344	-0.0848748	1.83135	2.31203
7	Right	F	76	4	9	30	19	19	15	10	1523	YES	NO	NO	-0.0241922	0.108071	0.0868531	0.332498	0.215639	0.414298	0.00112425	0.0658804	-0.0369676	-0.0730152	1.96333	2.88114
8	Right	F	68	4	5	25	10	26	8	16	800	YES	NO	NO	0.325244	0.339976	0.690001	0.383206	0.392718	0.376548	0.00169647	-0.020919	0.0120944	-0.0625438	1.39297	1.92013
9	Left	F	58	4	8	29	8	43	26	9	950	NO	YES	YES	0.114594	-0.0339477	0.159162	1.05251	0.918562	1.14628	0.131064	0.457836	-0.019176	-0.0121084	1.9236	2.72738
10	Right	M	65	4	15	40	24	10	4	11	1350	NO	NO	YES	0.0134493	0.166334	0.422417	0.389859	0.422379	0.367095	-0.013168	0.0608384	-0.0526382	-0.0397017	1.8613	2.59969
11	Right	M	66	4	2	21	1	46	27	8	950	NO	NO	NO	0.0560186	0.247037	0.653468	0.91576	0.980587	0.870381	0.0698404	0.285413	-0.0292734	0.00576223	2.14356	3.18196
12	Left	M	61	5	10	31	8	72	62	21	1750	YES	YES	NO	0.347455	0.170484	0.157696	0.317055	0.282771	0.341054	0.0727308	0.254909	-0.0110292	-0.0766331	2.09642	3.04699
13	Left	M	76	3	4	29	5	50	41	6	1250	NO	NO	NO	0.0895011	0.434767	1.04047	0.299879	0.404077	0.22694	-0.00128923	0.030762	-0.0160254	-0.0212649	1.36894	1.86936
14	Left	M	50	4	25	44	19	43	23	8	1750	NO	NO	YES	-0.119394	0.140134	0.721978	1.31328	1.39875	1.25346	0.0450929	0.293889	-0.0748087	0.025991	1.81761	2.59841
15	Right	M	72	4	7	27	13	30	20	6	1900	NO	YES	NO	0.0175961	0.141494	0.654265	0.862602	0.803009	0.904316	0.13165	0.500709	-0.0380316	-0.0565048	1.96432	2.51239
16	Left	M	71	5	2	38	16	28	16	11	799	YES	NO	YES	0.0785068	0.158942	0.438829	0.543832	0.59384	0.508826	0.010935	0.0504044	-0.00721177	-0.0202898	1.33899	1.98546
17	Left	M	69	6	9	34	5	38	13	14	1775	YES	NO	YES	0.227866	0.138241	0.468438	0.2331	0.335884	0.161151	0.0167173	0.0638119	-0.00493545	0.0179578	1.23073	1.89642
18	Left	F	73	4	9	29	9	52	33	6	1200	NO	NO	YES	0.66685	0.5099	0.484208	0.12369	0.0916566	0.146114	0.000828105	-0.053492	0.0258029	-0.0918359	1.40872	2.55122
19	Left	M	53	5	7	NaN	NaN	29	17	9	450	YES	NO	NO	0.598275	0.479212	0.249582	0.232602	0.252989	0.21833	0.0578927	-0.0471895	0.106206	-0.109473	1.03731	1.64855
20	Left	M	65	6	13	36	12	71	35	16	600	NO	NO	NO	0.234575	0.782408	1.13803	0.327385	0.538874	0.179342	0.0205269	-0.0433576	0.0498991	-0.101102	1.16447	1.73128
21	Right	F	74	6	7	38	18	31	14	13	750	YES	NO	NO	0.070801	0.241033	0.622474	0.768177	0.71291	0.806863	0.110062	0.356351	-0.00317385	-0.0791902	1.76352	2.32881
22	Right	M	56	5	41	67	15	42	24	21	1200	YES	NO	YES	0.204521	0.16264	0.478706	0.783725	0.748631	0.808292	0.0111923	0.0266	0.00286377	-0.159092	1.76029	2.78373
23	Left	M	66	5	12	42	18	41	30	10	795	YES	YES	YES	0.485489	0.540355	0.464737	0.203131	0.344412	0.104235	0.0744867	-0.0622143	0.137338	0.035559	0.948249	2.30993
24	Right	M	68	6	5	32	2	19	8	5	1300	YES	NO	YES	0.337658	0.542934	0.704513	0.407046	0.521262	0.327094	-0.002033	-0.0437873	0.0171644	-0.0339828	1.48915	2.14142
25	Right	M	52	4	20	49	15	33	10	9	1200	YES	NO	YES	-0.209324	-0.0814342	0.0381328	0.267289	0.18311	0.326214	-0.0328316	0.0931287	-0.10001	-0.0621403	1.78464	2.4191
26	Left	M	64	5	23	53	8	22	22	8	60	YES	YES	YES	0.35275	0.428111	0.485846	0.508063	0.566875	0.466895	0.0258552	-0.0664621	0.0683	-0.0429974	1.44643	2.12379
27	Left	M	66	2	10	49	10	43	30	6	2000	NO	NO	NO	0.124281	0.370105	0.87253	0.508322	0.428705	0.564053	0.0812134	0.326842	-0.0317191	-0.0314396	1.89871	2.43733
28	Left	F	79	3	6	38	13	34	NaN	4	360	NO	NO	NO	0.10417	0.312266	0.800485	0.583775	0.554101	0.604546	-0.00265672	0.0817524	-0.0453955	0.0223312	1.77804	2.37271
29	Right	M	64	5	6	28	9	31	13	18	868	NO	YES	NO	0.692236	0.448139	0.270659	0.103175	0.0510316	0.139676	0.0125073	-0.0634961	0.0474514	-0.084553	1.57329	3.04922
30	Right	M	61	6	24	59	20	18	9	11	650	YES	YES	NO	0.0168622	0.0469451	0.470602	1.07292	1.03724	1.0979	0.147025	0.518209	-0.0236343	-0.0378897	1.71539	2.38953
31	Right	M	75	4	2	25	7	46	30	6	300	NO	NO	YES	0.308668	0.420828	0.44103	0.194866	0.218736	0.178157	-0.00426619	-0.000731926	-0.00589114	0.024423	1.48274	2.6438
32	Right	M	73	2	4	25	14	22	15	7	1516	NO	NO	YES	0.0578003	0.462468	1.23745	0.959169	1.14179	0.831334	0.0164298	0.152381	-0.0507066	0.0124944	1.86841	2.62313
33	Left	F	77	4	11	39	7	53	10	10	1774	YES	YES	NO	0.398326	0.202048	0.190838	0.449743	0.398766	0.485428	0.038653	0.145779	-0.0106001	0.104042	1.49142	2.68082
34	Left	M	72	6	24	20	4	37	29	6	1550	YES	NO	YES	0.419081	0.464093	0.507164	0.399595	0.425216	0.38166	0.00554887	-0.0265237	0.0202949	0.0895169	1.22913	2.05884
35	Right	M	71	6	8	32	9	47	45	7	475	NO	YES	YES	0.150614	0.387195	0.819057	0.34879	0.343472	0.352512	0.00112743	0.0262794	-0.010994	-0.0669851	1.57436	2.30523
36	Right	F	64	2	10	32	13	66	45	3	560	NO	YES	NO	0.119154	0.305609	0.720193	0.476267	0.453122	0.492469	0.0801227	0.272837	-0.0332389	-0.00216227	1.96632	2.52119
37	Left	M	65	2	13	NaN	NaN	46	15	11	1813	NO	YES	YES	0.400611	0.132268	0.152987	0.444356	0.511322	0.39748	0.057287	-0.0196963	0.0926816	-0.0379048	1.70837	2.80471
38	Left	F	64	5	5	34	15	42	31	13	700	NO	NO	NO	0.140231	0.0938613	0.670826	0.672659	0.762642	0.60967	0.0233929	0.108479	-0.0176127	-0.0272091	1.41632	2.18429
39	Right	F	67	5	26	47	19	42	18	12	1504	NO	NO	NO	0.101617	0.320789	0.694427	0.710148	0.643649	0.756697	0.04161	0.183562	-0.0236552	-0.0632279	1.45494	2.05698
40	Left	M	50	1	28	55	15	48	44	23	2275	YES	YES	YES	0.0615247	0.10545	0.155259	1.21731	1.02608	1.35117	0.198493	0.649886	-0.00904326	-0.0470106	2.24666	3.28824
41	Left	M	72	3	19	52	22	20	10	9	1415	YES	YES	NO	0.135899	0.384304	0.896898	0.8384	0.998402	0.726399	0.0344774	0.197901	-0.0406598	-0.0716949	1.92925	2.63649
42	Left	M	67	2	9	NaN	22	57	23	11	805	YES	NO	NO	0.183488	0.991454	0.760877	0.424971	0.282639	0.524603	0.0387405	0.126497	-0.0114058	-0.0481059	1.85842	2.43714
43	Right	M	53	5	8	27	9	26	9	5	1950	YES	NO	NO	0.414495	0.0899682	0.0506042	0.533152	0.52586	0.538256	0.0743906	0.016055	0.101212	-0.0596021	1.38916	2.02032
44	Right	F	75	5	10	49	13	28	24	14	875	YES	YES	NO	0.00361539	-0.0872883	0.107121	0.459578	0.321389	0.556311	-0.0205273	0.0648073	-0.0730409	-0.0221402	2.37	3.38652
45	Left	M	67	6	16	46	10	56	36	15	615	NO	YES	YES	0.0366905	0.771777	1.04496	1.03261	1.24101	0.886729	0.0702374	0.295303	-0.0514198	-0.0773673	1.70394	2.15299
46	Left	F	81	3	9	31	14	51	19	10	1125	NO	NO	NO	0.261626	0.208913	0.299954	0.384497	0.311134	0.435851	0.0312063	0.0766164	0.00666036	-0.113896	1.42539	2.24615
47	Right	M	68	2	2	30	0	28	9	5	784	NO	NO	YES	0.0171259	-0.0058714	0.00993842	0.166777	-0.0136984	0.29311	-0.00982734	0.0991437	-0.0936512	-0.0300279	1.74152	2.36066
48	Left	M	80	4	14	47	12	41	30	14	500	NO	NO	NO	0.292895	0.279207	0.505873	0.407019	0.421393	0.396957	-0.000817981	-0.0278954	0.0116314	-0.228245	0.838643	1.52805
49	Left	M	50	4	4	31	3	29	12	10	1554	NO	NO	NO	0.0722311	0.219359	0.502437	0.853889	1.01313	0.742418	0.0416253	0.163584	-0.0252012	-0.0103029	1.60732	2.45368
50	Right	F	73	1	5	41	8	46	40	6	600	YES	YES	YES	0.3034	0.683958	0.802219	0.607784	0.571426	0.633234	-0.0121411	-0.0295401	-0.00375608	-0.059839	1.83238	2.54405

## Sheet: NormPSD
PtNum	BDI	NormPSD_1.0Hz	NormPSD_1.5Hz	NormPSD_2.0Hz	NormPSD_2.5Hz	NormPSD_3.0Hz	NormPSD_3.5Hz	NormPSD_4.0Hz	NormPSD_4.5Hz	NormPSD_5.0Hz	NormPSD_5.5Hz	NormPSD_6.0Hz	NormPSD_6.5Hz	NormPSD_7.0Hz	NormPSD_7.5Hz	NormPSD_8.0Hz	NormPSD_8.5Hz	NormPSD_9.0Hz	NormPSD_9.5Hz	NormPSD_10.0Hz	NormPSD_10.5Hz	NormPSD_11.0Hz	NormPSD_11.5Hz	NormPSD_12.0Hz	NormPSD_12.5Hz	NormPSD_13.0Hz	NormPSD_13.5Hz	NormPSD_14.0Hz	NormPSD_14.5Hz	NormPSD_15.0Hz	NormPSD_15.5Hz	NormPSD_16.0Hz	NormPSD_16.5Hz	NormPSD_17.0Hz	NormPSD_17.5Hz	NormPSD_18.0Hz	NormPSD_18.5Hz	NormPSD_19.0Hz	NormPSD_19.5Hz	NormPSD_20.0Hz	NormPSD_20.5Hz	NormPSD_21.0Hz	NormPSD_21.5Hz	NormPSD_22.0Hz	NormPSD_22.5Hz	NormPSD_23.0Hz	NormPSD_23.5Hz	NormPSD_24.0Hz	NormPSD_24.5Hz
1	10	-0.244453	0.279138	0.589312	0.767023	0.846852	0.832412	0.743799	0.643923	0.577667	0.531294	0.48569	0.443691	0.413696	0.39974	0.42037	0.487086	0.573501	0.636104	0.63491	0.558327	0.464942	0.442178	0.449062	0.425942	0.402841	0.392406	0.364595	0.35367	0.406075	0.468462	0.486134	0.458924	0.422147	0.430188	0.478934	0.504058	0.508528	0.530459	0.535553	0.507041	0.480321	0.452685	0.421705	0.417097	0.426879	0.423	0.411454	0.39773
2	3	-1.08625	-0.321928	0.0346812	0.136661	0.110473	0.0700928	0.0114078	-0.0594251	-0.0719337	-0.0571465	-0.0591029	-0.0825428	-0.110714	-0.12709	-0.137238	-0.129379	-0.0683459	0.0397023	0.161246	0.259203	0.305215	0.306378	0.297035	0.309926	0.348694	0.379935	0.365785	0.317297	0.289636	0.312581	0.35283	0.397972	0.467278	0.543294	0.583993	0.591058	0.605676	0.65459	0.723494	0.768888	0.783229	0.816075	0.873593	0.898538	0.878355	0.868182	0.90449	0.930271
3	6	-1.26802	-0.513029	-0.124007	0.0665552	0.15014	0.165109	0.147338	0.140396	0.174381	0.239792	0.299026	0.356135	0.448262	0.581636	0.727257	0.877766	1.01593	1.09627	1.11169	1.11758	1.14033	1.15781	1.17499	1.19555	1.17597	1.1196	1.08565	1.08752	1.09849	1.11225	1.12105	1.13167	1.17332	1.23376	1.29037	1.33569	1.35676	1.36746	1.39016	1.40352	1.39026	1.35778	1.30433	1.25507	1.24473	1.23967	1.2011	1.1337
4	16	-1.19218	-0.434779	-0.0274135	0.155419	0.188281	0.159573	0.138423	0.116959	0.067344	-0.00964749	-0.0906789	-0.11885	-0.037432	0.0676967	0.116621	0.139961	0.17361	0.218273	0.313863	0.475366	0.624977	0.712314	0.74535	0.740299	0.700197	0.670048	0.713388	0.792639	0.850738	0.882101	0.91201	0.96217	1.00013	0.988238	0.942924	0.920908	0.941498	0.963667	0.972904	0.984484	0.991301	0.998235	1.02495	1.04882	1.02087	0.950903	0.939785	0.99359
5	3	-0.340336	0.245771	0.510944	0.566323	0.490674	0.338614	0.169326	0.091895	0.121494	0.148651	0.120013	0.0951259	0.163892	0.271244	0.304784	0.269294	0.276091	0.369335	0.459363	0.482509	0.451676	0.419521	0.404229	0.409916	0.464058	0.527042	0.547278	0.552687	0.589185	0.632481	0.652035	0.662031	0.665617	0.653078	0.644557	0.658694	0.689454	0.722465	0.730287	0.7021	0.67533	0.68852	0.723697	0.725468	0.661109	0.574181	0.533287	0.522235
6	9	-1.16671	-0.394492	-0.010336	0.135597	0.162471	0.18396	0.219632	0.239646	0.248656	0.276374	0.335187	0.428605	0.604599	0.83356	1.00301	1.05667	1.01474	0.961372	0.962831	0.987085	0.973119	0.910492	0.877571	0.911516	0.935202	0.920713	0.883934	0.828191	0.785557	0.774978	0.764595	0.75813	0.760424	0.735364	0.685417	0.67629	0.733431	0.801268	0.844462	0.856783	0.832053	0.786046	0.753216	0.739976	0.740519	0.771823	0.840921	0.901511
7	9	-1.31882	-0.520323	-0.0995645	0.0912183	0.144351	0.138086	0.101079	0.0340195	0.0126273	0.0704566	0.100627	0.08706	0.118526	0.200295	0.240954	0.205355	0.131351	0.0748408	0.0439524	0.0234345	0.0278961	0.0685058	0.119489	0.152014	0.170992	0.189773	0.210105	0.230298	0.229732	0.202004	0.178353	0.172477	0.163882	0.158158	0.185324	0.242496	0.286748	0.290111	0.279486	0.291397	0.316396	0.338023	0.363627	0.404206	0.438562	0.460399	0.479756	0.472478
8	5	-0.763779	-0.101322	0.262434	0.437467	0.485374	0.457874	0.409639	0.38004	0.356754	0.339934	0.326771	0.287858	0.26942	0.329752	0.429282	0.536026	0.617303	0.624454	0.580171	0.594859	0.722342	0.878011	0.966841	0.949988	0.848861	0.733265	0.635378	0.514006	0.376636	0.320706	0.354042	0.390848	0.403057	0.389128	0.346435	0.29598	0.258718	0.23836	0.241485	0.261521	0.288521	0.313459	0.340886	0.381791	0.39777	0.353591	0.326002	0.405617
9	8	-0.965092	-0.173203	0.193008	0.289311	0.23109	0.132368	0.0149917	-0.073095	-0.0356193	0.0295379	0.0274186	-0.0243403	-0.057832	-0.0705465	-0.0671051	-0.0248521	0.030285	0.0736428	0.0982406	0.128025	0.209509	0.323494	0.43495	0.535183	0.605114	0.644991	0.682561	0.742101	0.824271	0.891291	0.919697	0.93098	0.944821	0.954916	0.967937	1.00357	1.05747	1.11568	1.17958	1.23298	1.25592	1.26845	1.29283	1.30536	1.28869	1.26707	1.25917	1.24241
10	15	-0.996478	-0.249159	0.0932046	0.170061	0.102348	0.0245655	-0.0603247	-0.115403	-0.0232993	0.116768	0.222658	0.281217	0.297563	0.286512	0.264656	0.251418	0.298763	0.422281	0.537109	0.578004	0.533913	0.427968	0.32988	0.316712	0.346688	0.362783	0.390147	0.437018	0.446385	0.397706	0.372707	0.427155	0.483354	0.494734	0.472795	0.443691	0.420977	0.397222	0.366626	0.353003	0.363336	0.384837	0.393207	0.37279	0.333783	0.298183	0.273011	0.260801
11	2	-1.24855	-0.41549	-0.0105642	0.162939	0.219686	0.20969	0.16985	0.173364	0.19318	0.178253	0.175286	0.209528	0.258255	0.33687	0.451558	0.569074	0.663993	0.716491	0.709641	0.64972	0.59816	0.624999	0.695666	0.766101	0.831046	0.880298	0.91082	0.94287	0.987703	1.02352	1.02271	0.986976	0.949533	0.936656	0.973317	1.05114	1.08417	1.02894	0.94956	0.933129	0.957152	0.978884	0.992565	1.00087	1.00318	0.997465	0.996512	1.00524
12	10	-1.07332	-0.132275	0.340365	0.538211	0.549321	0.453745	0.335362	0.231686	0.140652	0.0907108	0.10164	0.133761	0.169337	0.220475	0.275609	0.295703	0.256099	0.164822	0.0841969	0.093486	0.1373	0.133911	0.0960508	0.0938667	0.15303	0.233805	0.271292	0.226307	0.134264	0.103107	0.168427	0.256736	0.339366	0.396294	0.393333	0.352524	0.337312	0.354851	0.391178	0.446592	0.481157	0.455758	0.394457	0.35507	0.345956	0.334813	0.333042	0.363425
13	4	-0.819359	-0.176283	0.136646	0.232257	0.184887	0.0932452	0.0662545	0.11641	0.182537	0.233481	0.308891	0.445606	0.598728	0.736772	0.855708	0.950274	1.02515	1.07848	1.09502	1.0741	1.04606	1.0393	1.01542	0.909344	0.72509	0.580488	0.545354	0.527788	0.480344	0.407614	0.327762	0.280217	0.273955	0.277561	0.301278	0.365946	0.424907	0.439937	0.423932	0.395427	0.352079	0.29367	0.247044	0.245675	0.273692	0.284287	0.265553	0.258488
14	25	-1.19767	-0.454201	-0.10781	-0.0180865	-0.0528805	-0.0541556	-0.0292298	-0.0257458	-0.000859293	0.0474587	0.102158	0.171338	0.234056	0.274267	0.318402	0.400084	0.518012	0.644608	0.750069	0.823927	0.867343	0.878899	0.892884	0.972466	1.08286	1.15582	1.19297	1.22112	1.22848	1.22013	1.27467	1.38013	1.44086	1.44734	1.46504	1.53988	1.62795	1.682	1.70605	1.71384	1.69195	1.6296	1.55046	1.50197	1.48737	1.4576	1.39621	1.31521
15	7	-1.21293	-0.435779	-0.0724448	0.0671661	0.136592	0.199842	0.2102	0.144253	0.0723763	0.0629066	0.0702165	0.0737521	0.124212	0.222741	0.361493	0.512981	0.625965	0.6739	0.669687	0.665226	0.691359	0.706677	0.688324	0.668594	0.662611	0.662661	0.686915	0.745908	0.80727	0.846726	0.857709	0.822427	0.765812	0.762823	0.795586	0.815197	0.846517	0.899566	0.927008	0.904387	0.870897	0.873699	0.893076	0.907507	0.926999	0.926135	0.884029	0.867433
16	2	-0.85895	-0.25359	0.045965	0.158524	0.168185	0.163826	0.18813	0.188383	0.135489	0.0854334	0.095048	0.138703	0.171052	0.202217	0.255207	0.307877	0.348701	0.4018	0.460253	0.487896	0.485602	0.489615	0.528889	0.593836	0.640969	0.64942	0.643807	0.655164	0.663953	0.643215	0.639569	0.673496	0.678779	0.64037	0.584048	0.49772	0.39598	0.408146	0.540096	0.644062	0.685617	0.689846	0.685879	0.695045	0.701674	0.675131	0.626485	0.588053
17	9	-0.632473	-0.0473867	0.249963	0.363965	0.359117	0.277195	0.164344	0.0773353	0.0206091	-0.0130596	0.0216142	0.109393	0.197274	0.293514	0.399247	0.499323	0.581935	0.6075	0.543287	0.432528	0.372721	0.357945	0.352266	0.358105	0.331427	0.273122	0.240528	0.237386	0.267291	0.337122	0.399848	0.430904	0.437149	0.421596	0.392727	0.354325	0.315697	0.301689	0.292989	0.251115	0.199452	0.171684	0.143182	0.103308	0.0853477	0.0971989	0.124911	0.164676
18	9	-0.210673	0.421226	0.684141	0.744422	0.734743	0.726008	0.69056	0.619761	0.566034	0.544749	0.518065	0.484141	0.4524	0.43906	0.454986	0.478876	0.499875	0.532492	0.552672	0.523751	0.470214	0.430187	0.385598	0.333391	0.293393	0.252727	0.214156	0.191338	0.160518	0.126076	0.11204	0.0903122	0.0292849	-0.0333555	-0.0269963	0.0201252	0.04462	0.051796	0.0505513	0.0371064	0.0490557	0.0942032	0.11539	0.0777213	0.0260209	0.0287035	0.0563385	0.0940346
19	7	-0.367024	0.187696	0.489756	0.659481	0.766203	0.790159	0.696356	0.54372	0.490077	0.530807	0.546528	0.510616	0.456959	0.406542	0.348444	0.311949	0.344848	0.385496	0.355758	0.258417	0.155609	0.0997426	0.08484	0.0743429	0.0582555	0.0816242	0.147887	0.205029	0.240059	0.260105	0.261424	0.250872	0.257488	0.302384	0.348988	0.357222	0.320966	0.263322	0.244477	0.29095	0.332667	0.314283	0.250135	0.21222	0.241348	0.269372	0.276693	0.321223
20	13	-0.743697	-0.166827	0.154417	0.30991	0.361112	0.366977	0.381864	0.423741	0.476874	0.569263	0.718323	0.85784	0.969827	1.07709	1.1663	1.22551	1.25348	1.24987	1.23001	1.18676	1.09376	0.977348	0.887517	0.803369	0.692039	0.571449	0.483451	0.469691	0.523513	0.578732	0.606099	0.614063	0.601453	0.574768	0.54771	0.516657	0.495078	0.489325	0.472243	0.428403	0.36246	0.313486	0.309366	0.299747	0.252739	0.199743	0.180624	0.186659
21	7	-1.09107	-0.352286	0.012188	0.157021	0.19754	0.21125	0.199094	0.163384	0.137175	0.139161	0.163904	0.20335	0.257577	0.366563	0.497152	0.579524	0.618061	0.6306	0.598079	0.542398	0.560705	0.669159	0.78126	0.829539	0.795389	0.719691	0.678982	0.71248	0.778726	0.812983	0.796033	0.751784	0.708043	0.675037	0.661499	0.667526	0.670408	0.665506	0.682045	0.728069	0.771063	0.800958	0.844574	0.889863	0.905606	0.912145	0.927517	0.942684
22	41	-0.835565	-0.129609	0.202487	0.316268	0.32689	0.293856	0.217233	0.144183	0.116958	0.113015	0.118489	0.130502	0.158791	0.220996	0.298182	0.340949	0.364139	0.409235	0.462416	0.511107	0.554745	0.585078	0.601982	0.605765	0.616158	0.667314	0.727516	0.754421	0.750496	0.726204	0.690959	0.670708	0.679527	0.709103	0.770188	0.837719	0.853109	0.825528	0.818039	0.836733	0.854902	0.889868	0.963758	1.0477	1.1256	1.18961	1.19732	1.12157
23	12	-0.288517	0.237686	0.532497	0.643515	0.608119	0.487835	0.403275	0.44401	0.565015	0.67365	0.682367	0.570608	0.452645	0.451768	0.482766	0.51874	0.574432	0.592199	0.522236	0.399129	0.356195	0.388157	0.366806	0.299818	0.293975	0.336836	0.339291	0.335866	0.391932	0.431565	0.384016	0.315823	0.356938	0.435249	0.434833	0.36147	0.279624	0.224991	0.193326	0.165554	0.132625	0.131972	0.161799	0.157266	0.108736	0.072797	0.0812124	0.103314
24	5	-0.712743	-0.0326091	0.326578	0.476522	0.487515	0.424968	0.342973	0.276278	0.256881	0.321263	0.456176	0.614189	0.755563	0.834375	0.828748	0.765537	0.687455	0.616564	0.603247	0.682395	0.759624	0.772475	0.748806	0.730428	0.716888	0.69774	0.667867	0.624609	0.57232	0.512163	0.454703	0.431107	0.423616	0.4131	0.442024	0.50375	0.540414	0.526855	0.487405	0.486979	0.53478	0.564822	0.55226	0.523016	0.489174	0.437061	0.381154	0.358363
25	20	-1.52424	-0.747453	-0.336357	-0.140457	-0.0561224	-0.00291952	0.0273666	0.0128082	-0.0338985	-0.0919799	-0.152443	-0.159978	-0.115238	-0.0740247	-0.0367199	0.0328773	0.120723	0.155842	0.11285	0.027616	-0.0452759	-0.0607408	-0.0388297	-0.0345292	-0.0213194	0.0366988	0.105948	0.159117	0.207539	0.260118	0.298008	0.292194	0.234389	0.15109	0.10205	0.116268	0.157171	0.202357	0.240592	0.257843	0.263145	0.268262	0.261656	0.252085	0.266671	0.290464	0.310093	0.345223
26	23	-0.543521	0.123631	0.454595	0.549995	0.472233	0.312399	0.203646	0.194183	0.239518	0.30706	0.388452	0.488633	0.570996	0.608965	0.627083	0.63417	0.602515	0.538844	0.48788	0.463114	0.440138	0.392896	0.327212	0.292854	0.307291	0.352333	0.413098	0.443604	0.434952	0.472854	0.570766	0.633499	0.648282	0.661993	0.669627	0.645795	0.625911	0.658718	0.704815	0.720556	0.730703	0.74238	0.722721	0.672758	0.625604	0.591778	0.554841	0.501241
27	10	-1.27847	-0.471306	-0.00860982	0.243281	0.333451	0.323862	0.325007	0.38854	0.426522	0.39093	0.319406	0.274049	0.27392	0.360988	0.526485	0.684338	0.793163	0.866499	0.927014	0.972714	0.980158	0.929241	0.827109	0.71108	0.62113	0.575754	0.554619	0.523974	0.500926	0.502055	0.490913	0.441115	0.362447	0.292036	0.268817	0.293257	0.345036	0.400017	0.450911	0.512545	0.563274	0.562363	0.529799	0.521752	0.535775	0.554454	0.587662	0.607341
28	6	-1.29279	-0.463313	0.0182297	0.271035	0.345692	0.287109	0.166266	0.11715	0.222079	0.334122	0.345755	0.30024	0.307014	0.381624	0.490142	0.624192	0.765127	0.879212	0.9397	0.938918	0.879218	0.763397	0.614114	0.492781	0.436872	0.426298	0.443777	0.462368	0.45965	0.461672	0.490731	0.522251	0.542053	0.556818	0.575602	0.617735	0.680848	0.736255	0.781356	0.815202	0.823067	0.808683	0.802137	0.800184	0.78343	0.782863	0.800141	0.780213
29	6	-0.404836	0.290741	0.64486	0.792101	0.820491	0.80954	0.795685	0.754569	0.671208	0.570425	0.466179	0.349253	0.256634	0.242407	0.274439	0.299282	0.288882	0.232398	0.171567	0.192092	0.281422	0.34686	0.352765	0.317686	0.255767	0.173842	0.109159	0.0789561	0.0596859	0.0415405	0.0175101	-0.0122611	-0.0113524	0.0227697	0.0373934	0.03472	0.0478695	0.0601873	0.0544209	0.0511667	0.0707707	0.108386	0.14496	0.174288	0.18848	0.167063	0.119185	0.101678
30	24	-1.11392	-0.371864	0.00536726	0.14764	0.148999	0.105836	0.0651931	0.0232822	-0.001941	0.0120034	0.0319034	0.0374801	0.0577287	0.090661	0.124441	0.189194	0.26829	0.322357	0.388539	0.508202	0.625249	0.695117	0.76787	0.898404	1.04323	1.1496	1.20142	1.20953	1.19281	1.15043	1.07125	0.974184	0.91465	0.908624	0.921098	0.937545	0.956901	0.970299	0.962961	0.948031	0.954356	0.967021	0.987055	1.04228	1.10507	1.14842	1.18618	1.21572
31	2	-0.677641	-0.0216128	0.290063	0.4017	0.42379	0.410181	0.347884	0.278012	0.27749	0.309124	0.344125	0.405149	0.48682	0.586607	0.679295	0.709092	0.65787	0.561309	0.462088	0.36891	0.291936	0.245222	0.231815	0.261912	0.301574	0.309698	0.303927	0.30481	0.289195	0.23985	0.176806	0.148493	0.177174	0.219444	0.235593	0.218994	0.172689	0.123607	0.142028	0.223434	0.283101	0.286982	0.251533	0.208405	0.196606	0.216552	0.210908	0.180893
32	4	-1.24534	-0.464797	-0.0585202	0.138682	0.226905	0.2516	0.252931	0.273023	0.305558	0.354217	0.400192	0.42509	0.495819	0.63818	0.807667	0.986309	1.12484	1.18198	1.19266	1.2453	1.3478	1.41668	1.40402	1.33944	1.29692	1.28563	1.26267	1.21216	1.14535	1.07937	1.03841	1.05509	1.10123	1.12089	1.11964	1.12857	1.14554	1.1503	1.14022	1.14595	1.18893	1.22738	1.20782	1.13673	1.06952	1.04696	1.04335	0.988286
33	11	-0.718462	-0.0487175	0.306797	0.479136	0.549179	0.565228	0.538332	0.466549	0.366338	0.255888	0.141573	0.0806018	0.107693	0.121006	0.076739	0.0692447	0.131452	0.161296	0.145492	0.149893	0.204284	0.292724	0.372318	0.396102	0.376488	0.379405	0.423457	0.456641	0.439591	0.394823	0.38059	0.375865	0.328933	0.275081	0.304578	0.397961	0.465519	0.484152	0.476125	0.469712	0.476342	0.477963	0.472507	0.476291	0.480506	0.477519	0.490432	0.51179
34	24	-0.451585	0.137441	0.425401	0.525069	0.516649	0.468741	0.441186	0.421689	0.386009	0.433248	0.536896	0.557205	0.486115	0.429275	0.462309	0.533471	0.568215	0.529916	0.455686	0.435831	0.473587	0.512718	0.547891	0.571769	0.552784	0.492969	0.445037	0.437628	0.446914	0.463918	0.469153	0.434839	0.397465	0.397955	0.402717	0.395893	0.392532	0.389252	0.386744	0.398719	0.412688	0.430137	0.473333	0.51761	0.499708	0.440971	0.425769	0.441751
35	8	-0.891126	-0.172947	0.194414	0.318179	0.269731	0.161404	0.132905	0.187234	0.230428	0.22511	0.204507	0.242172	0.42381	0.688603	0.8957	0.981362	0.940194	0.836686	0.814947	0.866099	0.850518	0.726647	0.536003	0.360815	0.280515	0.292707	0.32167	0.339746	0.347523	0.342208	0.330727	0.319601	0.313267	0.318654	0.339687	0.369474	0.386996	0.388317	0.398037	0.423351	0.440742	0.442309	0.455151	0.487468	0.489697	0.444538	0.401827	0.394967
36	10	-1.2402	-0.425584	0.00844582	0.224608	0.31582	0.325467	0.266167	0.195384	0.186826	0.226575	0.288274	0.347766	0.388668	0.406123	0.405259	0.416122	0.447137	0.524416	0.682609	0.84259	0.939328	0.968852	0.940488	0.873102	0.795899	0.730727	0.677633	0.60269	0.48944	0.395769	0.377082	0.402414	0.429623	0.432787	0.398905	0.345471	0.314475	0.339581	0.407109	0.462792	0.474999	0.473017	0.498575	0.518958	0.496272	0.450923	0.410398	0.394913
37	13	-0.597868	0.135828	0.46806	0.53325	0.477368	0.438834	0.350337	0.174308	0.0688099	0.0204688	0.0154099	0.122198	0.203367	0.2384	0.215187	0.154194	0.125525	0.12978	0.135827	0.137702	0.147595	0.18116	0.212121	0.233022	0.324104	0.557419	0.819344	0.974972	0.97871	0.841607	0.617927	0.393949	0.258497	0.234916	0.243156	0.243551	0.262132	0.322144	0.410199	0.479148	0.510289	0.516171	0.50149	0.466974	0.435079	0.432882	0.439064	0.414477
38	5	-0.842984	-0.207154	0.104959	0.225798	0.252778	0.25365	0.211354	0.156203	0.130865	0.103521	0.0669812	0.0477695	0.0435225	0.0621246	0.139903	0.247525	0.326984	0.42013	0.611736	0.831226	0.973466	1.00564	0.949899	0.876186	0.832175	0.779565	0.713114	0.702983	0.758221	0.814546	0.831427	0.81738	0.812677	0.822205	0.812846	0.761694	0.689782	0.66502	0.695525	0.72015	0.718342	0.709453	0.706539	0.707404	0.699042	0.668144	0.622816	0.593691
39	26	-0.886838	-0.213291	0.113011	0.21856	0.207245	0.166476	0.117703	0.0780224	0.0703111	0.112023	0.225146	0.366916	0.472907	0.558385	0.682601	0.787606	0.777482	0.65869	0.572856	0.622112	0.701336	0.729325	0.706012	0.694574	0.717753	0.712739	0.686901	0.690945	0.715503	0.734434	0.735803	0.703671	0.629927	0.555978	0.547239	0.572621	0.573943	0.56791	0.583473	0.611337	0.637275	0.648114	0.653265	0.655425	0.635288	0.618268	0.639933	0.65216
40	28	-1.12118	-0.250548	0.160043	0.255718	0.135012	0.0184476	0.0504744	0.0845929	0.101549	0.126186	0.155145	0.144223	0.101427	0.077479	0.052994	0.0173709	0.0179474	0.07304	0.139384	0.176608	0.200143	0.260306	0.357271	0.471204	0.606772	0.735751	0.820227	0.859423	0.876437	0.899559	0.934716	0.957523	0.985467	1.06801	1.16224	1.20124	1.21236	1.27733	1.37483	1.42762	1.42274	1.38571	1.34713	1.33683	1.36133	1.38603	1.36293	1.2782
41	19	-1.22107	-0.405937	0.0349215	0.255356	0.329022	0.316395	0.285635	0.271118	0.268396	0.26483	0.291811	0.369072	0.448705	0.533302	0.627194	0.683583	0.712907	0.801662	0.932698	1.00867	1.01531	1.00407	1.01629	1.04187	1.07328	1.11845	1.1437	1.13283	1.12858	1.12746	1.08522	1.01003	0.942171	0.903423	0.882615	0.854986	0.838774	0.87687	0.932524	0.944067	0.913862	0.89153	0.894593	0.892917	0.869951	0.833292	0.805773	0.795542
42	9	-1.11136	-0.312141	0.0994935	0.264997	0.291563	0.325722	0.431291	0.534831	0.638506	0.813497	1.01735	1.16765	1.24696	1.26885	1.24399	1.18074	1.08835	0.957144	0.774887	0.594421	0.499088	0.48059	0.511805	0.553779	0.569829	0.552967	0.490623	0.383014	0.273741	0.207676	0.188873	0.206788	0.247022	0.282458	0.271324	0.211717	0.179641	0.209643	0.25146	0.277324	0.289431	0.2968	0.318459	0.359357	0.415904	0.468186	0.481806	0.489516
43	8	-0.446286	0.168675	0.468258	0.577181	0.562119	0.441626	0.269111	0.183901	0.167699	0.128927	0.0904886	0.0662153	0.0372207	0.019949	0.0253446	0.0165103	0.00735148	0.0269987	0.0463111	0.0635047	0.0900122	0.0924597	0.0616851	0.0438982	0.0713348	0.152849	0.288514	0.404529	0.448812	0.47938	0.573063	0.67676	0.714491	0.67904	0.622549	0.591625	0.568773	0.563027	0.598628	0.632609	0.641976	0.647108	0.643741	0.608229	0.578403	0.642392	0.746788	0.776116
44	10	-1.38405	-0.496465	-0.0296154	0.176292	0.208276	0.137526	0.025678	-0.0569076	-0.0983264	-0.151289	-0.165758	-0.0948594	-0.0413078	-0.0411862	-0.0486728	-0.0449207	0.0128671	0.130477	0.210451	0.205945	0.147443	0.0993044	0.0954014	0.118432	0.146553	0.178973	0.219722	0.262727	0.300463	0.316344	0.296158	0.279293	0.316919	0.360435	0.358034	0.340694	0.370918	0.429816	0.468946	0.497549	0.535586	0.581809	0.6435	0.688346	0.675023	0.645972	0.660724	0.668071
45	16	-1.27566	-0.527298	-0.111537	0.107511	0.206143	0.249964	0.29536	0.350091	0.388596	0.435364	0.56444	0.818449	1.09137	1.25404	1.27186	1.18522	1.08122	1.01447	0.9945	1.01584	1.02994	1.01801	1.02047	1.05384	1.08053	1.08349	1.08609	1.0992	1.11845	1.14791	1.17155	1.17401	1.17924	1.24241	1.35753	1.4498	1.47349	1.43294	1.3581	1.27796	1.2119	1.17129	1.14682	1.12871	1.10588	1.06125	1.00815	0.995977
46	9	-0.528812	0.114045	0.394121	0.429565	0.325168	0.206594	0.100259	0.0136008	0.0150293	0.0558356	0.0804988	0.135875	0.307281	0.492088	0.571099	0.539812	0.452384	0.361394	0.28275	0.224675	0.196964	0.183957	0.157695	0.142291	0.180286	0.225034	0.238269	0.248186	0.267011	0.27953	0.285299	0.292656	0.31329	0.340985	0.347777	0.338811	0.353671	0.396518	0.428839	0.430742	0.416035	0.407917	0.431986	0.490674	0.537483	0.546385	0.544926	0.562128
47	2	-1.0629	-0.345959	0.0188412	0.159653	0.162363	0.0998833	0.00797315	-0.0774282	-0.121689	-0.0933092	-0.0170709	0.0407568	0.0625593	0.0673338	0.0918758	0.159929	0.223523	0.208489	0.0999533	-0.0424429	-0.143371	-0.198351	-0.228221	-0.206472	-0.129583	-0.0625125	-0.04803	-0.0743585	-0.0974469	-0.0823076	-0.0166787	0.0740822	0.129686	0.109396	0.03078	-0.0423584	-0.0731615	-0.0520749	0.0132074	0.0779132	0.109367	0.110449	0.118804	0.175326	0.25843	0.32503	0.355753	0.346267
48	14	-0.547874	-0.0273343	0.255857	0.38054	0.410968	0.386905	0.350435	0.351258	0.35579	0.304085	0.235475	0.21679	0.220421	0.230642	0.319195	0.466885	0.570559	0.609002	0.607818	0.56851	0.4908	0.40115	0.332258	0.313172	0.319899	0.322091	0.354122	0.406835	0.421214	0.403779	0.401924	0.396077	0.361906	0.357167	0.404971	0.457189	0.508154	0.550319	0.553754	0.526075	0.516765	0.544311	0.555504	0.507508	0.443323	0.434414	0.434161	0.385157
49	4	-1.07747	-0.372314	0.00900662	0.18696	0.224912	0.200191	0.18463	0.172928	0.142078	0.142252	0.196889	0.238462	0.249011	0.277778	0.335473	0.375923	0.386125	0.400614	0.436835	0.480138	0.54338	0.644589	0.751891	0.841775	0.929687	1.01047	1.05017	1.04268	1.02142	1.01361	1.01922	1.02588	1.01762	0.995868	0.983848	0.992077	1.00234	1.00562	1.00306	0.986085	0.956012	0.934116	0.934209	0.955555	0.968965	0.947149	0.894822	0.834212
50	5	-0.965657	-0.196012	0.214983	0.414306	0.47993	0.467829	0.439363	0.448321	0.493165	0.563092	0.673328	0.789503	0.846794	0.83767	0.819788	0.835391	0.866132	0.889815	0.887491	0.847982	0.783835	0.704324	0.602782	0.499378	0.457248	0.515869	0.60548	0.637104	0.606428	0.580487	0.590572	0.589296	0.551321	0.497211	0.463752	0.485842	0.562211	0.6366	0.677791	0.701467	0.720191	0.730426	0.74151	0.780745	0.839711	0.865515	0.833269	0.767756
[truncated: 951 more columns]
